## **Plant to animal protein ratio in the diet: nutrient adequacy, long-term health and environmental pressure.**

Hélène Fouillet<sup>1\*</sup>, Alison Dussiot<sup>1</sup>, Elie Perraud<sup>1</sup>, Juhui Wang<sup>1</sup>, Jean-François Huneau<sup>1</sup>, Emmanuelle Kesse-Guyot<sup>2</sup>, François Mariotti<sup>1\*</sup>

<sup>1</sup>Université Paris-Saclay, AgroParisTech, INRAE, UMR PNCA, 91120, Palaiseau, France.

<sup>2</sup>Sorbonne Paris Nord University, Inserm, Inrae, Cnam, Nutritional Epidemiology Research Team (EREN), Epidemiology and Statistics Research Center (CRESS) – University of Paris, 93017 Bobigny, France.

\* Address correspondence to Dr. Helene Fouillet, [helene.fouillet@agroparistech.fr](mailto:helene.fouillet@agroparistech.fr) or Prof. François Mariotti, [francois.mariotti@agroparistech.fr](mailto:francois.mariotti@agroparistech.fr).

**Sources of support for the work:** This research did not receive any specific grant from funding agencies in the public, commercial, or not-for-profit sectors.

**Potential conflicts of interest:** HF has received a research grant by INRAE from Roquette. FM has received research grants as PhD fellowships under his direction by AgroParisTech and INRAE from Terres Univia and Ecotone foundation, under the aegis of Fondation de France.

**Abbreviations used:** ANSES, French Agency for Food, Environmental and Occupational Health and Safety; CIQUAL, French Information Centre on Food Quality; DALYs, Disability-adjusted life-years; *DD*, Diet departure criterion; GBD, Global Burden of Diseases; GHGe, greenhouse gas emissions; *HR*, Health risk criterion; INCA3, Third Individual and National Study on Food Consumption French Survey; %PP, Percentage of plant protein in the diet; TMREL, Theoretical minimum risk exposure level.

1 **Abstract**

2 **Background:** Animal and plant protein sources have contrasting relationships with nutrient adequacy and long-  
3 term health, and their adequate ratio is highly debated.

4 **Objective:** We aimed to explore how the percentage of plant protein in the diet (%PP) relates to nutrient  
5 adequacy and long-term health but also to environmental pressures, to determine the adequate and potentially  
6 optimal %PP values.

7 **Methods:** Observed diets were extracted from the dietary intakes of French adults (INCA3, n=1 125). Using  
8 reference values for nutrients and disease burden risks for foods, we modeled diets with graded %PP values  
9 that simultaneously ensure nutrient adequacy, minimize long-term health risks and preserve at best dietary  
10 habits. This multi-criteria diet optimization was conducted in a hierarchical manner, giving priority to long-term  
11 health over diet proximity, under the constraints of ensuring nutrient adequacy and food cultural acceptability.  
12 We explored the tensions between objectives and identified the most critical nutrients and influential constraints  
13 by sensitivity analysis. Finally, environmental pressures related to the modeled diets were estimated using the  
14 AGRIBALYSE database.

15 **Results:** We find that nutrient-adequate diets must fall within the ~15%-80% %PP range, a slightly wider range  
16 being nevertheless identifiable by waiving the food acceptability constraints. Fully healthy diets, also achieving  
17 the minimum-risk exposure levels for both unhealthy and healthy foods, must fall within the 25%-70% %PP  
18 range. All of these healthy diets were very distant from current typical diet. Those with higher %PP had lower  
19 environmental impacts, notably on climate change and land use, while being as far from current diet.

20 **Conclusions:** There is no single optimal %PP value when considering only nutrition and health, but high %PP  
21 diets are more sustainable. For %PP>80%, nutrient fortification/supplementation and/or new foods are required.

22 **Keywords:**

23 Plant-based diets; Healthy dietary patterns; Nutrient adequacy; Environmental footprints; Diet optimization;  
24 Human.

## 25 **Introduction**

26 Historical and current nutritional transitions are coupled with changes in the relative contribution of dietary animal  
27 and plant proteins. This has been studied from hunter-gatherers to post-agricultural societies (1), from traditional  
28 diets that enabled thriving civilizations to diets in post-industrialized countries (2, 3), and more recently, in  
29 western countries with the emerging trend toward more plant-predominant diets.

30 Changes in plant and animal protein intake raise classic nutritional questions. One in particular concerns the  
31 possible risk of deficiency with diets too low in animal protein, since animal protein foods contribute significantly  
32 to the intake of indispensable nutrients (4). However, plant proteins are also important for the intake of some  
33 indispensable nutrients and fiber, and are also lower in saturated fats (5). Beyond the relationship to nutrient  
34 adequacy, animal/plant proteins and their packages largely affect the metabolome and the microbiota and  
35 physiological functions that are crucial for long-term health (5-8). Accordingly, there have been many contrasting  
36 associations reported recently between plant and animal protein intake and mortality, especially regarding  
37 cardiovascular diseases (5, 9, 10).

38 More globally, plant (such as legumes, nuts and whole grains) and animal (such as red and processed meats)  
39 protein sources have heterogeneous relationships to nutrient adequacy (11) and to long-term health regarding  
40 cardiovascular diseases (7, 12-14) and cancers (15, 16). There is indeed a challenge for food-based dietary  
41 guidelines to point out what proportions of plant and animal protein foods should be recommended (17, 18).  
42 However, the plant to animal protein ratio remains a poor, summarizing descriptor of dietary patterns, since two  
43 diets with the same plant to animal protein ratio can actually be very different (7). There is thus a need to  
44 analyze the overall proportion of plant protein in the diet in view of the related dietary profiles and their nutritional  
45 adequacy and healthiness.

46 Furthermore, current interest in the proportions of plant and animal proteins in the diet also stems from their  
47 differential association with environmental pressures, in particular greenhouse gas emissions (GHGe) and land  
48 use (19-22). Altogether, the plant to animal protein ratio in the diet appears central to the sustainability of the  
49 food systems (19, 23). This has implications for dietary guidelines that aim to encompass both human and  
50 planetary health (24-26).

51 Here, using advanced diet modeling and optimization, we studied whether an optimal proportion of plant protein  
52 in the diet (%PP, the percentage of plant protein in total protein intake) can be identified when taking into  
53 account the reference values for nutrients and the disease burden risks for food categories. We characterized  
54 modeled diets that departed as little as possible from prevailing diets at all levels of adequate %PP values for  
55 nutrient adequacy and long-term health to identify nutritional issues (i.e., limiting nutrients) and dietary levers  
56 (i.e., effective foods). We furthermore estimated the environmental pressures associated with modeled diets  
57 along the whole range of adequate %PP values.

## 58 **Materials and Methods**

### 59 Input of dietary data

60 The data used for this study were extracted from the French Individual and National Study on Food  
61 Consumption Survey 3 (INCA3) conducted in 2014-2015. The INCA3 survey is a representative cross-sectional  
62 survey of the French population; its method and design have been fully described elsewhere (27). Males aged  
63 18-64 y ( $n=564$ ) and pre-menopausal females aged 18-54 y ( $n=561$ ), not identified as under-reporters, were  
64 included in the present study; the final sample contained 1125 adults (Fig. S1).

65 Dietary data were collected by professional investigators assisted by a dietary software from three unplanned,  
66 non-consecutive, 24h dietary recalls spread over a three-week period. Portion sizes were estimated using  
67 validated photographs (27), and the nutrient contents of different food items came from the 2016 food  
68 composition database operated by the French Information Centre on Food Quality (CIQUAL) (28). Mixed foods  
69 were broken down into ingredients and then gathered into 45 food groups (Table S1). For each sex, the nutrient  
70 content of each food group was calculated as the mean nutrient content of food items constituting the food group  
71 weighted by their mean intake by the sex considered, as previously described (29). All dietary data (food group  
72 consumption and nutrient content) relate to the total population of each sex (including non-consumers).

### 73 Multi-criteria diet optimization under constraints

74 Using multi-criteria optimization, we identified modeled diets (i.e., modeled consumptions of the 45 food groups)  
75 with a minimal long-term health risk and a minimal departure from the observed diet (taking into account cultural  
76 acceptability and inertia), under constraints that would ensure adequate nutrient intakes and remain within  
77 current consumption limits. In this context, we investigated the role of %PP to identify its adequate range of  
78 variations and to characterize the dietary, nutritional and environmental consequences of these variations.

79 This non-linear optimization problem was performed using the NLP solver of the OPTMODEL procedure of SAS  
80 software version 9.4 (SAS Institute Inc., Cary, NC, USA.). Optimization was implemented at the population level  
81 but in males and females, separately. The optimized diets of males and females were then averaged to derive  
82 optimized diets for the adult population.

## 83 Objectives

84 The main optimization objective was to minimize the long-term health risk of the modeled diet, as assessed by  
85 the Health Risk (*HR*) criterion. The *HR* criterion was set to target the dietary recommendations from the Global  
86 Burden of Diseases (GBD) based on epidemiological studies about the associations between consumption of  
87 different food groups and risk of chronic diseases (30). The *HR* criterion thus aimed to limit the consumption of  
88 three unhealthy food groups or categories (red meat, processed meat and sweetened beverages), while  
89 promoting that of six healthy food groups or categories (whole grain products, fruits, vegetables, legumes, nuts  
90 and seeds, and milk) until their minimum risk exposure levels (TMREL) were reached. According to the most  
91 recent (2019) estimates from the GBD, TMREL values were 0 g/d for red meat, processed meat and sweetened  
92 beverages, and 150, 325, 300, 95, 14.5 and 430 g/d, respectively, for whole grain products, fruits, vegetables,  
93 legumes, nuts and seeds, and milk (30). In our study, the *HR* criterion was thus expressed and minimized as:

$$94 \quad \text{Min } HR = \sum_{i=1}^3 \left( \frac{\text{Opt}(i)}{\text{Max}(i)} \times \frac{\text{DALYs}(i)}{\text{DALYs}(\text{all})} \right) + \sum_{j=1}^6 \left( \max \left[ \frac{\text{TMREL}(j) - \text{Opt}(j)}{\text{TMREL}(j)}; 0 \right] \times \frac{\text{DALYs}(j)}{\text{DALYs}(\text{all})} \right)$$

95 Where *i* denotes the food groups to be decreased (red meat, processed meat and sweetened beverages), *j*  
96 denotes the food groups to be increased (whole grain products, fruits, vegetables, legumes, nuts and seeds, and  
97 milk), *Opt*(*i*) and *Opt*(*j*) are the optimized consumptions of food groups *i* and *j*, respectively (in g/d), *Max*(*i*) is the  
98 upper limit of consumption of food group *i* (in g/d), *TMREL*(*j*) is the TMREL value of food group *j* (in g/d),  
99 *DALYs*(*i*) and *DALYs*(*j*) are the disability-adjusted life-years (DALYs) associated with excessive or insufficient  
100 consumptions of food groups *i* and *j*, respectively (in y), and *DALYs*(all) is the sum of all *DALYs*(*i*) and *DALYs*(*j*).  
101 The *Max* values used were the maximal recommended consumption of unhealthy foods in line with the French  
102 dietary guidelines (31): 71g/d for red meat, 25g/d for processed meat and 263 g/d (corresponding to the average  
103 portion size) for sweetened beverages intake. The TMREL and DALYs values used were issued from the most  
104 recent (2019) estimates from the GBD (30) adapted to our study context (by using sex-specific and French  
105 DALYs values, Table S2).

106 We also evaluated how the modeled diets deviated from current diets, in order to consider inertia to changes in  
107 food consumption, which is one way to account for social/cultural acceptability. The Diet Departure (*DD*) criterion  
108 was defined as the sum of the squares of the differences between observed and optimized food group

109 consumption, standardized by their observed standard deviations, as previously explained (29). *DD* was thus  
110 expressed and minimized as:

111 
$$\text{Min } DD = \sum_{k=1}^n \left[ \frac{\text{Obs}(k) - \text{Opt}(k)}{\text{SD}(k)} \right]^2$$

112 Where *k* is the number of food groups (*n*=45), *Obs*(*k*) and *Opt*(*k*) are respectively the observed and optimized  
113 consumption of food group *k* (in g/d) and *SD*(*k*) is the current standard deviation of the consumption of food  
114 group *k*.

### 115 Constraints

116 During diet optimization, the total energy intake was constrained to stay within ±5% of its observed value. Thirty-  
117 five nutritional constraints were applied to ensure adequate nutrient intake in the male and female populations  
118 (Table S3), based on the most recent reference values from the French Agency for Food, Environmental and  
119 Occupational Health & Safety (ANSES) (32). We did not consider any constraints for vitamin D, because its  
120 reference value is known to be much too high to be reached by a non-fortified diet alone (29, 31). As the  
121 absorption of iron and zinc is dependent on dietary factors, the requirements were based on bioavailable iron  
122 and zinc calculated from the dietary intake using equations that predict their absorption (33-35), as detailed in a  
123 previous study by our group (29). This previous study had demonstrated that current recommendations  
124 regarding bioavailable iron and zinc are very constraining when trying to model healthier diets, these  
125 recommendations being much higher than current intakes (e.g., there is a current iron-deficiency anemia  
126 prevalence of 4.1% in French women) (29). Therefore, like in this previous study, we used threshold values  
127 lower than current reference values. They correspond to a deficiency prevalence of 5%, because such flexibility  
128 enables the identification of diets that are apparently healthier overall, with a better balance in DALYs due to less  
129 cardiometabolic disease, despite a higher prevalence of iron-deficiency anemia (29). In addition, to take into  
130 account the slightly lower digestibility of plant vs animal proteins regarding the nutritional constraint on protein  
131 requirement, a 5% penalty was applied to protein intake from plant protein food items, as previously described  
132 (36). As the intake of individual amino acids is generally adequate when the protein intake is sufficient in a varied  
133 diet (37), only protein requirements were considered in the model constraints, but we have *a posteriori* verified

134 that modeled diets also contained adequate intakes of indispensable amino acids by using a database of the  
135 amino acid composition of food groups (Supporting Information Text S1).  
136 Moreover, some acceptability constraints were applied to the food group consumption (Table S4). Acceptability  
137 constraints aimed to keep the food group intakes within the range of observed intakes, by bounding each food  
138 group intake between its 5<sup>th</sup> and 95<sup>th</sup> percentile of observed consumption in males and females separately. We  
139 did not do this for the unhealthy food groups or categories (red meat, processed meat and sweetened  
140 beverages), for which a dietary constraint with an upper limit was already defined according to the French dietary  
141 guidelines. Another exception was made for some healthy food groups (legumes and milk) that had 95<sup>th</sup>  
142 percentile values slightly lower than TMREL values, and for which the upper limit has thus been raised to their  
143 TMREL values.

#### 144 Optimization strategy

145 We firstly aimed to determine the range of adequate %PP values in the diet that would ensure nutrient adequacy  
146 with a minimal long-term health risk. This first problem of identifying the adequate %PP range was addressed by  
147 optimizing the *HR* criterion under all the nutritional and acceptability constraints, with an additional constraint on  
148 %PP that was iteratively parameterized according to a grid search. This grid search constraint forced the %PP  
149 value to be equal to x%, with x% varying from 0% to 100% by steps of 5% (or even 1% at the edges of the  
150 adequate %PP range). As this problem was often non-uniquely identifiable, leading to different solutions with  
151 slightly distinct dietary patterns but similar *HR* values (especially for the intermediate %PP values that allowed  
152 for a variety of food group combinations with a similarly null *HR* value), we choose to systematically select the  
153 dietary solution that was the most acceptable *a priori*, based on the lowest departure from the current diet.  
154 According to the hierarchical method in multi-criteria optimization (38), this second problem of diet selection was  
155 addressed in a second stage. This time it was done by optimizing the *DD* criterion under the constraint that *HR*  
156 was equal to its previously identified minimal value, always under all the nutritional and acceptability constraints,  
157 and the grid search constraint on %PP covering its previously identified adequate range.

#### 158 Limiting nutrients and contribution of food groups to their intake

159 We conducted a dual value analysis to better characterize the tensions between %PP, nutrient adequacy and  
160 long-term health. We reported the dual values associated with the %PP equality constraint and the nutritional



161 constraints during *HR* optimization (obtained during the first problem solving, as explained above), which  
162 represent the potential *HR* gain if the limiting bound (lower or upper) of the considered constraint was relaxed by  
163 one unit. In order to compare the relative influence of nutrients, their dual values were standardized to represent  
164 the potential *HR* gain if the limiting bound was relaxed by 10%, to classify nutrients from the most limiting (higher  
165 absolute standardized dual value) to the least limiting (lowest absolute standardized dual value).

166 For the most limiting nutrients in the different modeled diets (i.e., nutrients with the most active constraints), we  
167 studied contributions of different food groups to intake of that particular nutrient in each modeled diet identified  
168 for each adequate %PP value (i.e., in the modeled diets resulting from the second problem solving, as explained  
169 above).

#### 170 Sensitivity analysis

171 We also conducted a sensitivity analysis to assess the influence of some constraints of particular interest. We  
172 thus compared the results obtained when requiring the deficiency prevalence to be  $\leq 1\%$  rather than  $\leq 5\%$  (main  
173 model) in the nutritional constraints for bioavailable iron and zinc (their alternative threshold values are given in  
174 Table S3), and when removing or not (main model) all the dietary and acceptability constraints on food group  
175 intakes.

#### 176 Diet environmental impacts

177 Finally, to assess environmental pressures related to the observed and modeled diets, we used the French  
178 agricultural life cycle inventory database AGRIBALYSE® v3.1; its methodological approach (summarized in  
179 Supporting Information Text S2) has been described elsewhere (39-41). In particular, we evaluated the food-  
180 related GHGe (in kg CO<sub>2</sub>eq, with the non-CO<sub>2</sub> GHGe included and weighted according to their relative impact on  
181 warming), land use (referring to the use and transformation of land, dimensionless), water use (relating to the  
182 local scarcity of water, in m<sup>3</sup> water deprivation) and fossil resource use (use of non-renewable fossil resources  
183 such as coal, oil, and gas, in MJ), together with a single environmental footprint score (dimensionless) that  
184 aggregated 16 indicators (42).

## 185 **Results**

### 186 Range of adequate %PP values and identified tensions between %PP, nutrient adequacy and long-term health

187 The adequate %PP range compatible with nutrient adequacy was 16%-82% in males and 16%-77% in females,  
188 and only the 25%-70% %PP range was additionally compatible with a minimal health risk (*HR* criterion) for both  
189 sexes (**Table 1**). In this narrower range, a null *HR* value was attained by the removal of unhealthy foods (red  
190 meat, processed meat and sweetened beverages) and an increase in healthy foods (whole grain products, fruits,  
191 vegetables, legumes, nuts and seeds, and milk) up to or above their TMREL values (30).

192 Among the %PP equality constraint and the nutritional constraints, none were found limiting for *HR* minimization  
193 over the 25%-70% %PP range (**Table 2**). The %PP equality constraint was limiting only for %PP values lower  
194 than 25% (strongly) and higher than 70% (more moderately, due to the lower *HR* impact of the milk decrease for  
195 the highest %PP values than of the red meat increase and whole grain product decrease for the lowest %PP  
196 values). Nutrients identified as increasingly limiting as %PP decreased below 25% were fiber, sugar (excluding  
197 lactose), saturated fatty acids and atherogenic fatty acids (lauric, myristic and palmitic acids). As %PP  
198 decreased below 25%, it was hence increasingly challenging to maintain sufficient intake of fiber and non-  
199 excessive intakes of sugar and fatty acids (as shown by the opposite sign of their dual values), which resulted in  
200 dietary solutions of increasingly degraded *HR* values. Nutrients that were identified as increasingly limiting when  
201 %PP increased above 70% were iodine, sodium, vitamin B2, calcium, EPA+DHA, vitamin A and  $\alpha$ -linolenic acid  
202 in both sexes together with vitamin B12 in males and bioavailable iron in females. As %PP increased above  
203 70%, it was increasingly challenging to maintain sufficient intakes of these nutrients and a non-excessive sodium  
204 intake. The other nutrients (n=20, those not shown in Table 2) were never limiting over the adequate %PP  
205 range, including, of note, protein.

206 Sensitivity analysis showed that being more demanding for bioavailable iron and zinc (i.e., constraining their  
207 deficiency prevalence at  $\leq 1\%$  rather than  $\leq 5\%$  as in the main model) resulted in slightly restricting the adequate  
208 %PP range on the right (16%-79% in males and 16%-70% in females), and the %PP range ensuring a null *HR*  
209 value on both sides (30%-65% in males and 35%-45% in females) (data not shown). Conversely, when  
210 suppressing all the food group consumption limits (i.e., all the dietary and acceptability constraints) from the  
211 model (Table S5), the range of adequate %PP values was expanded on both sides (8%-94% in males and 8%-

212 92% in females), as was the %PP range ensuring a null *HR* value (16%-86% in males and 16%-84% in  
213 females), but consistently with the same limiting nutrients as in the main model (in particular, insufficient fiber  
214 intake for excessively low %PP values, or insufficient intakes of vitamin B12, iodine and EPA+DHA for  
215 excessively high %PP values).

#### 216 Modeled diets

217 All the modeled diets identified (**Fig. 1** and Fig. S2) were very distant from the current typical French diets, with  
218 departure values (*DD* criterion) equal to or greater than twice the standard deviation observed in the population.  
219 Furthermore, most of the modeled diets with a null *HR* value (i.e., in the 25%-70% %PP range) were all about  
220 equally distant from the observed diets, with close *DD* values (differing by less than 20%) in the 35%-65% %PP  
221 range and similar *DD* values (differing by less than 5%) in the 45%-60% %PP range.

222 Although the energy intake remained relatively stable between modeled and observed diets (by construction),  
223 the total intakes of both animal-based and plant-based foods were increased in the 25%-70% %PP range,  
224 notably owing to the important increases in milk, fruits and vegetables up to or above their TMREL values (Table  
225 S6 and Fig. S4). Regarding plant products, all the modeled diets exhibited dramatic increases in fruits and  
226 vegetables, whole grain products and legumes and nuts. Regarding animal products, red and processed meats  
227 were readily removed as %PP increased. These meats were replaced by poultry and eggs, which transiently  
228 increased, the modeled diets then being meat-free from PP%=60%. Dairy and seafood were the only remaining  
229 animal products at the right end of the adequate %PP range (Fig. S3).

230 Over the entire adequate %PP range, including meat-free diets, the intakes of protein and of each indispensable  
231 amino acid were always much higher than their 98% safe intake thresholds (**Fig. 2** and Table S7 and Fig. S4).

#### 232 Contributions of food groups to limiting nutrient intakes

233 Regardless of their %PP value, all the modeled diets were nutrient-adequate, in contrast with observed diets  
234 (Table S8).

235 As %PP increased, it was increasingly difficult to maintain sufficient intakes of bioavailable iron, vitamins B12, B2  
236 and A, and iodine and calcium, owing to the decreases in the animal products that were their main contributors  
237 (red meat, dairy products and eggs) (Fig. S5). The EPA+DHA and  $\alpha$ -linolenic acid intakes, which are largely  
238 insufficient in the observed diets, were made sufficient in all the modeled diets by increases in their main

239 contributors, respectively, seafood and added fats, with difficulties to maintain them sufficient for the highest  
240 %PP values (Fig. S5). The sodium intake, which is dramatically excessive in the observed diets, was reduced to  
241 its upper limit in all the modeled diets as a result of removing processed meat and reducing refined grain  
242 products, with difficulties to maintain sodium not excessive for the highest %PP values, due to increases in some  
243 starch and miscellaneous foods (Fig. S5). Conversely, as %PP decreased, it was increasingly difficult to  
244 maintain a sufficient intake of fiber and non-excessive intakes of sugar and saturated fatty acids, due to the meat  
245 and dairy increases (Fig. S6).

#### 246 Environmental impacts of modeled diets

247 Across modeled diets, GHGe gradually decreased as %PP increased until %PP=70%, where the GHGe were  
248 ~50% lower than with the observed diet (**Fig. 3**). Similar trends were observed for land use and, to a lesser  
249 extent, fossil resource use (Fig. S7), with 40% and ~20% decreases, respectively, from the observed to the  
250 modeled diet with %PP=70%. In contrast, water use was ~25%-50% higher for the null-*HR* modeled diets than  
251 for the observed diet, due to their very high levels of fruits and vegetables that were by far the most water-  
252 demanding food groups (Fig. S7). Overall, at the level of the single environmental footprint score that  
253 aggregated 16 indicators, the same trend was observed as for GHGe, with a 37% decrease in this aggregated  
254 score from the observed to the modeled diet with %PP=70% (Fig. S7).

## 255 **Discussion**

256 Gathering all nutritional information over a large spectrum that covered nutrient reference values and long-term  
257 health risks, our study formally establishes ranges of plant protein proportion (%PP) for nutrient-adequate and  
258 healthy diets. One major finding is that there is no optimal %PP value, as we found a spectrum of similarly  
259 healthy diets over the 25%-70% range. However, diets in the upper end were associated with substantially lower  
260 GHGe and overall environmental impact.

261 A wide dietary %PP range, from ~15% to 80%, was found compatible with providing all nutrients in adequate  
262 amounts. Our results do not agree with those of Vieux *et al.*, who recently argued that %PP must be <50% to  
263 ensure nutritional adequacy (43). However, in this diet optimization study, solutions with %PP >50% were  
264 rejected not because of their true intrinsic inability to meet nutrient requirements but because of an incorrect  
265 problem formulation, as we recently pointed out (44). Furthermore, by not analyzing how the constraints  
266 considered affected the results and by not identifying the limiting nutrients, this work was not informative about  
267 the nutritional barriers to increasing %PP, which was our concern here along with its other health and  
268 environmental impacts. In our study, as shown by sensitivity analysis, the wide %PP range identified as  
269 compatible with nutritional adequacy was slightly restrained by the considered constraints for food acceptability,  
270 whereas the nutritional issues identified remained broadly the same with or without these constraints. From a  
271 nutritional viewpoint, no diet with %PP < ~15% was able to provide enough fiber and non-excessive amounts of  
272 saturated fatty acids, while also satisfying all constraints for nutrient intakes and food acceptability. More  
273 interestingly, given the ongoing dietary transition, we could not find diets with %PP > ~80% that would provide  
274 sufficient amounts of a large set of nutrients, particularly iodine, vitamin B12 (in males), bioavailable iron (in  
275 females), calcium and EPA+DHA. These nutrients are considered to be at issue in vegetarian diets (except  
276 calcium and iodine in lacto-ovo-vegetarian), notably calcium and B12 in predominantly plant-based diets (45,  
277 46). From a dietary viewpoint, as shown when approaching the critical value of %PP=80%, dairy appeared to be  
278 key to preventing iodine and calcium shortages. Seafood, meanwhile, appeared critical to providing EPA+DHA  
279 (with oily fishes as the main source) as well as iodine and B12. Milk and seafood were the last remaining animal  
280 products at the highest %PP values, confirming their importance as healthy, nutrient-dense protein sources (47).  
281 Healthy plant protein sources such as legumes and nuts apparently could not replace milk or seafood. This is

282 because they actually reached their upper allowed intake very early (as soon as %PP=25% for legumes), which  
283 indicates that they constitute an effective dietary lever. However, even when removing all food intake limits (in  
284 sensitivity analysis), it remained impossible to obtain 100% plant-based diets because of the same nutritional  
285 issues (insufficient intakes of vitamin B12, iodine and EPA+DHA). Our findings do not indicate that vegetarian  
286 (without seafood) or vegan diets (without seafood and dairy) cannot be nutritionally adequate. It means that  
287 solutions for diets that are entirely or almost entirely plant-based should rely on additional food products than  
288 those presently consumed by the general population, including fortified foods (48-50). This warrants further  
289 studies about the potential of new foods to extend the limit of the %PP range identified as adequate here.

290 Within the wide range of nutrient-adequate %PP values, we did not find a single optimal diet, but a large range  
291 of diets with %PP from 25% to 70%. These diets were all optimal when considering their health value, because  
292 their food consumptions complied with minimum-risk exposure levels. These consisted of no red meat and high  
293 levels of fruits and vegetables, whole grains, legumes, nuts and milk, in line with dietary guidelines (51). Modeled  
294 healthy diets were variations of this pattern, which explains why they were also similarly distant from current  
295 diets. Within this healthy pattern spectrum, the increase in %PP was predominantly related to the decrease in  
296 total and animal proteins. This occurred mostly in poultry and eggs and, to a lesser extent, dairy. This finding  
297 aligns well with the current spectrum of observed diets, with plant-based diets being higher in plant protein but  
298 especially low in total and animal protein (52, 53). This could simply be ascribed to the higher protein density in  
299 animal protein sources compared to plant protein sources. Also, the nutrients identified as limiting at the borders  
300 of the healthy %PP range appear to be related to the nutrient density of animal vs plant protein sources when  
301 expressed relative to protein density. However, the dietary protein amount was never limiting, even at the  
302 highest %PP levels. There is a growing consensus that the protein package and not the protein per se are  
303 important to the question of plant to animal protein ratio in the diet (5, 7). Likewise, indispensable amino acid  
304 amounts were well above reference values based on requirements. In real diets, composed of a mix of different  
305 types of proteins that complement each other, sufficient amounts of protein appear to guarantee sufficient  
306 amounts of amino acids (20, 53, 54).

307 Distance from the prevailing diets is often used in diet modeling to take into account so-called cultural  
308 acceptability (55-57), also referred to as dietary inertia (58). In this study, healthy diets in the 35-65% %PP range  
309 departed rather similarly from the prevailing diets, which are still at ~35% %PP. This confirms that the plant to

310 animal protein ratio is, by itself, a poor descriptor of diet characteristics, and so blanket statements about the  
311 right %PP are not warranted. Given that modeled healthy diets ranging from 35% %PP (the level of the current  
312 diets in western countries) to 65% %PP were all very distant from current diets, our study also shows that  
313 overcoming dietary inertia is required for healthy diets, irrespective of the plant to animal protein target ratio (59).  
314 The GHGe and overall composite score for environmental pressures were lower for healthy modeled diets than  
315 observed diets, and all the more as %PP increased. A large body of literature has reported that diets which are  
316 more plant-based are associated with lower environmental pressure, and vice versa, whether diets were  
317 modeled (46, 57, 60, 61), observed (62-64) or composite (23). However, until our study, this relationship had not  
318 yet been shown according to %PP in healthy diets. In our setting, %PP was strongly associated with the  
319 environmental impact of healthy diets. As compared to the prevailing diets, lower GHGe and composite score  
320 are firstly explained by the removal of total red meat in all healthy diets, red meat accounting for ~1/3 of the  
321 pressure in prevailing diets. This is in line with the literature that points to red meat and associated sustainability  
322 concerns (61, 65). Finally, we found that other environmental pressures (land use and fossil resource use),  
323 except water use, had similar patterns of change, in line with the literature (19, 46). The general relationship  
324 between %PP and environmental pressure can mostly be ascribed to the fact that animal sources are rich in  
325 protein, and that livestock breeding is associated with higher resource use, higher land use, and higher GHGe  
326 (21, 66-68). Nevertheless, further investigation of the relationship between %PP and environmental impacts  
327 would require prioritizing the minimization of environmental impacts over that of diet departure. Therefore, we  
328 cannot rule out the possibility that moderate %PP diets, if well-designed, may have as low environmental  
329 impacts as high %PP diets, at the cost of a larger diet departure.

330 This study has some limitations. We modeled diets according to changes in intakes of food groups, based on the  
331 present food repertoire and current intake levels in the population. Food grouping is critical in diet modeling (31),  
332 and food diversity and composition can change rapidly in western countries, as seen by recent changes (69). A  
333 similar limitation applies to the assessment of a diet's environmental impacts, for which also we did not consider  
334 variations related to food production systems (70, 71). Nevertheless, we used a classical food grouping, which  
335 helps represent dietary patterns at an appropriately high level of detail. We also believe that using  
336 standard/traditional foods in modeling provides a good starting point to evaluate the situation before considering  
337 changes in the food offer or food composition. Our study uses sources of information as background

338 parameters, including references/targets for nutrients and food categories. Clearly, there are many uncertainties  
339 in this regard (31). Nonetheless, we believe that a strength of our study is our use of a conceptual framework  
340 that aggregates most of the state of the art knowledge in nutrition.

341 To conclude, we identified that the range of equally optimal %PP values for nutrition and health is wide (25%-  
342 70%), and that all of these healthy diets deviate greatly from prevailing diets. From a public health perspective,  
343 there is no unique, optimal %PP value when considering nutrition and health alone. However, significant  
344 changes in current eating habits are nonetheless required to achieve healthier diets. Moreover, in the higher end  
345 of the plant protein percentage range, modeled healthy diets have a lower environmental impact and are thus  
346 more sustainable than other healthy diets. At %PP > ~80%, changes in food repertoire diversity, food  
347 composition, nutrient enrichment or nutrient supplementation are required for fully nutrient-adequate diets.

348 **Acknowledgments:** The authors thank Vincent Colomb and Mélissa Cornélius (Ademe) for their important  
349 support in the use of the AGRIBALYSE database.

350 **Author Contributions:** HF and FM designed the research; HF conducted the research and analyzed the data;  
351 AD, EP, FM, JW, J-FH and EK-G provided methodological support and help with interpretation of the results; HF  
352 and FM wrote the first draft of the manuscript; and all authors provided critical comments on the manuscript. HF  
353 and FM had primary responsibility for the final content, and all authors have read and approved the final  
354 manuscript.

355 **Data Sharing:** Data described in the manuscript, code book, and analytic code will be made available upon  
356 request pending application and approval.



## References

1. Styring AK, Fraser RA, Arbogast R-M, Halstead P, Isaakidou V, Pearson JA, et al. Refining human palaeodietary reconstruction using amino acid  $\delta^{15}\text{N}$  values of plants, animals and humans. *J Archaeol Sci*. 2015;53:504-15. doi: 10.1016/j.jas.2014.11.009.
2. World Health Organization (WHO). Diet, nutrition and the prevention of chronic diseases. 3. Global and regional food consumption patterns and trends. 2003/05/29 ed, 2003:1-149.
3. Winnie Gerbens-Leenes P. Dietary Transition: Longterm Trends, Animal Versus Plant Energy Intake, and Sustainability Issues. In: Mariotti F, ed. *Vegetarian and Plant-Based Diets in Health and Disease Prevention*: Academic Press, 2017:117-34.
4. Phillips SM, Fulgoni VL, 3rd, Heaney RP, Nicklas TA, Slavin JL, Weaver CM. Commonly consumed protein foods contribute to nutrient intake, diet quality, and nutrient adequacy. *The American journal of clinical nutrition*. 2015. doi: 10.3945/ajcn.114.084079.
5. Mariotti F. Animal and Plant Protein Sources and Cardiometabolic Health. *Adv Nutr*. 2019;10(Suppl\_4):S351-S66. doi: 10.1093/advances/nmy110.
6. Lepine G, Fouillet H, Remond D, Huneau JF, Mariotti F, Polakof S. A Scoping Review: Metabolomics Signatures Associated with Animal and Plant Protein Intake and Their Potential Relation with Cardiometabolic Risk. *Adv Nutr*. 2021;12(6):2112-31. doi: 10.1093/advances/nmab073.
7. Richter CK, Skulas-Ray AC, Champagne CM, Kris-Etherton PM. Plant Protein and Animal Proteins: Do They Differentially Affect Cardiovascular Disease Risk? *Adv Nutr*. 2015;6(6):712-28. doi: 10.3945/an.115.009654.
8. Dietrich S, Trefflich I, Ueland PM, Menzel J, Penczynski KJ, Abraham K, et al. Amino acid intake and plasma concentrations and their interplay with gut microbiota in vegans and omnivores in Germany. *Eur J Nutr*. 2022;61(4):2103-14. doi: 10.1007/s00394-021-02790-y.
9. Naghshi S, Sadeghi O, Willett WC, Esmailzadeh A. Dietary intake of total, animal, and plant proteins and risk of all cause, cardiovascular, and cancer mortality: systematic review and dose-response meta-analysis of prospective cohort studies. *BMJ*. 2020;370:m2412. doi: 10.1136/bmj.m2412.
10. Zhong VW, Allen NB, Greenland P, Carnethon MR, Ning H, Wilkins JT, et al. Protein foods from animal sources, incident cardiovascular disease and all-cause mortality: a substitution analysis. *Int J Epidemiol*. 2021;50(1):223-33. doi: 10.1093/ije/dyaa205.
11. Salomé M, de Gavelle E, Dufour A, Dubuisson C, Volatier JL, Fouillet H, et al. Plant-Protein Diversity Is Critical to Ensuring the Nutritional Adequacy of Diets When Replacing Animal With Plant Protein: Observed and Modeled Diets of French Adults (INCA3). *J Nutr*. 2020;150(3):536-45. doi: 10.1093/jn/nxz252.
12. Malik VS, Li Y, Tobias DK, Pan A, Hu FB. Dietary Protein Intake and Risk of Type 2 Diabetes in US Men and Women. *American journal of epidemiology*. 2016;183(8):715-28. doi: 10.1093/aje/kwv268.
13. Tharrey M, Mariotti F, Mashchak A, Barbillon P, Delattre M, Fraser GE. Patterns of plant and animal protein intake are strongly associated with cardiovascular mortality: the Adventist Health Study-2 cohort. *Int J Epidemiol*. 2018;47(5):1603-12. doi: 10.1093/ije/dyy030.
14. Guasch-Ferre M, Satija A, Blondin SA, Janiszewski M, Emlen E, O'Connor LE, et al. Meta-Analysis of Randomized Controlled Trials of Red Meat Consumption in Comparison With Various Comparison Diets on Cardiovascular Risk Factors. *Circulation*. 2019;139(15):1828-45. doi: 10.1161/CIRCULATIONAHA.118.035225.
15. Farvid MS, Sidahmed E, Spence ND, Mante Angua K, Rosner BA, Barnett JB. Consumption of red meat and processed meat and cancer incidence: a systematic review and meta-analysis of prospective studies. *Eur J Epidemiol*. 2021;36(9):937-51. doi: 10.1007/s10654-021-00741-9.
16. Huang Y, Cao D, Chen Z, Chen B, Li J, Guo J, et al. Red and processed meat consumption and cancer outcomes: Umbrella review. *Food Chem*. 2021;356:129697. doi: 10.1016/j.foodchem.2021.129697.
17. Havemeier S, Erickson J, Slavin J. Dietary guidance for pulses: the challenge and opportunity to be part of both the vegetable and protein food groups. *Ann N Y Acad Sci*. 2017;1392(1):58-66. doi: 10.1111/nyas.13308.

18. Comerford KB, Miller GD, Reinhardt Kapsak W, Brown KA. The Complementary Roles for Plant-Source and Animal-Source Foods in Sustainable Healthy Diets. *Nutrients*. 2021;13(10):3469. doi: 10.3390/nu13103469.
19. Clark MA, Springmann M, Hill J, Tilman D. Multiple health and environmental impacts of foods. *Proc Natl Acad Sci U S A*. 2019;116(46):23357-62. doi: 10.1073/pnas.1906908116.
20. Katz DL, Doughty KN, Geagan K, Jenkins DA, Gardner CD. Perspective: The Public Health Case for Modernizing the Definition of Protein Quality. *Adv Nutr*. 2019;10(5):755-64. doi: 10.1093/advances/nmz023.
21. Xu XM, Sharma P, Shu SJ, Lin TS, Ciais P, Tubiello FN, et al. Global greenhouse gas emissions from animal-based foods are twice those of plant-based foods. *Nat Food*. 2021;2(9):724-32. doi: 10.1038/s43016-021-00358-x.
22. Jarmul S, Dangour AD, Green R, Liew Z, Haines A, Scheelbeek PFD. Climate change mitigation through dietary change: a systematic review of empirical and modelling studies on the environmental footprints and health effects of 'sustainable diets'. *Envir Res Lett*. 2020;15(12):123014. doi: 10.1088/1748-9326/abc2f7.
23. Reinhardt SL, Boehm R, Blackstone NT, El-Abbadi NH, McNally Brandow JS, Taylor SF, et al. Systematic Review of Dietary Patterns and Sustainability in the United States. *Adv Nutr*. 2020;11(4):1016-31. doi: 10.1093/advances/nmaa026.
24. Kesse-Guyot E, Rebouillat P, Brunin J, Langevin B, Alles B, Touvier M, et al. Environmental and nutritional analysis of the EAT-Lancet diet at the individual level: insights from the NutriNet-Sante study. *J Clean Prod*. 2021;296:126555. doi: 10.1016/j.jclepro.2021.126555.
25. Willett W, Rockstrom J, Loken B, Springmann M, Lang T, Vermeulen S, et al. Food in the Anthropocene: the EAT-Lancet Commission on healthy diets from sustainable food systems. *Lancet*. 2019;393(10170):447-92. doi: 10.1016/S0140-6736(18)31788-4.
26. Tuomisto HL. Importance of considering environmental sustainability in dietary guidelines. *Lancet Planet Health*. 2018;2(8):e331-e2. doi: 10.1016/S2542-5196(18)30174-8.
27. Dubuisson C, Dufour A, Carrillo S, Drouillet-Pinard P, Havard S, Volatier JL. The Third French Individual and National Food Consumption (INCA3) Survey 2014-2015: method, design and participation rate in the framework of a European harmonization process. *Public health nutrition*. 2019;22(4):584-600. doi: 10.1017/S1368980018002896.
28. The French Agency for Food Environmental and Occupational Health & Safety (ANSES). ANSES-CIQUAL French food composition table. Version 2016. <https://ciqual.anses.fr/>
29. Dussiot A, Fouillet H, Wang J, Salome M, Huneau JF, Kesse-Guyot E, et al. Modeled healthy eating patterns are largely constrained by currently estimated requirements for bioavailable iron and zinc—a diet optimization study in French adults. *The American journal of clinical nutrition*. 2022;115(3):958-69. doi: 10.1093/ajcn/nqab373.
30. GBD Risk Factors Collaborators. Global burden of 87 risk factors in 204 countries and territories, 1990-2019: a systematic analysis for the Global Burden of Disease Study 2019. *Lancet*. 2020;396(10258):1223-49. doi: 10.1016/S0140-6736(20)30752-2.
31. Mariotti F, Havard S, Morise A, Nadaud P, Sirot V, Wetzler S, et al. Perspective: Modeling Healthy Eating Patterns for Food-Based Dietary Guidelines—Scientific Concepts, Methodological Processes, Limitations, and Lessons. *Adv Nutr*. 2021;12(3):590-9. doi: 10.1093/advances/nmaa176.
32. The French Agency for Food Environmental and Occupational Health & Safety (ANSES). Avis de l'ANSES relatif à l'Actualisation des références nutritionnelles françaises en vitamines et minéraux. Saisine n°2018-SA-0238, saisine liée n°2012-SA-0103. Maisons-Alfort, 2021. <https://www.anses.fr/fr/system/files/NUT2018SA0238Ra.pdf>
33. Armah SM, Carriquiry A, Sullivan D, Cook JD, Reddy MB. A complete diet-based algorithm for predicting nonheme iron absorption in adults. *J Nutr*. 2013;143(7):1136-40. doi: 10.3945/jn.112.169904.
34. Hallberg L, Hulthen L. Prediction of dietary iron absorption: an algorithm for calculating absorption and bioavailability of dietary iron. *The American journal of clinical nutrition*. 2000;71(5):1147-60. doi: 10.1093/ajcn/71.5.1147.
35. Miller LV, Krebs NF, Hambidge KM. Mathematical model of zinc absorption: effects of dietary calcium, protein and iron on zinc absorption. *The British journal of nutrition*. 2013;109(4):695-700. doi: 10.1017/S000711451200195X.
36. de Gavelle E, Huneau JF, Mariotti F. Patterns of Protein Food Intake Are Associated with Nutrient Adequacy in the General French Adult Population. *Nutrients*. 2018;10(2):226. doi: 10.3390/nu10020226.

37. de Gavelle E, Huneau JF, Bianchi CM, Verger EO, Mariotti F. Protein Adequacy Is Primarily a Matter of Protein Quantity, Not Quality: Modeling an Increase in Plant:Animal Protein Ratio in French Adults. *Nutrients*. 2017;9(12):1333. doi: 10.3390/nu9121333.
38. Mausser H, Grodzewich O, Romanko O. Normalization and other topics in multi-objective optimization. *Proceedings of the Fields–MITACS Industrial Problems Workshop*, 2006:89-101.
39. ADEME. Agribalyse data v3.1. ADEME, 2022. <https://doc.agribalyse.fr/documentation-en/>
40. Colomb V, Amar SA, Mens CB, Gac A, Gaillard G, Koch P, et al. AGRIBALYSE (R), the French LCI Database for agricultural products: high quality data for producers and environmental labelling. *Ocl-Oilseeds and Fats Crops and Lipids*. 2015;22(1). doi: 10.1051/ocl/20140047.
41. Koch P, Salou T. AGRIBALYSE®: Rapport Méthodologique - Volet Agriculture - Version 3.1. Angers, France: ADEME, 2022:p. 342. [https://3613321239-files.gitbook.io/~files/v0/b/gitbook-x-prod.appspot.com/o/spaces%2F-LpO7Agg1DbhEBNAvmHP%2Fuploads%2FQN0ySICvr4UDCrC3JbmE%2FM%C3%A9thodologie%20AGB%203.1\\_Production%20agricole.pdf?alt=media&token=4da12058-cd06-4948-9d20-d7fa7f371835](https://3613321239-files.gitbook.io/~files/v0/b/gitbook-x-prod.appspot.com/o/spaces%2F-LpO7Agg1DbhEBNAvmHP%2Fuploads%2FQN0ySICvr4UDCrC3JbmE%2FM%C3%A9thodologie%20AGB%203.1_Production%20agricole.pdf?alt=media&token=4da12058-cd06-4948-9d20-d7fa7f371835)
42. European Commission. Guidance for the development of Product Environmental Footprint Category Rules (PEFCRs). version 6.3, 2018. [https://ec.europa.eu/environment/eussd/smgp/pdf/PEFCR\\_guidance\\_v6.3.pdf](https://ec.europa.eu/environment/eussd/smgp/pdf/PEFCR_guidance_v6.3.pdf)
43. Vieux F, Remond D, Peyraud JL, Darmon N. Approximately Half of Total Protein Intake by Adults Must be Animal-Based to Meet Non-Protein, Nutrient-Based Recommendations, With Variations Due to Age and Sex. *J Nutr*. 2022;152(11):2514-25. doi: 10.1093/jn/nxac150.
44. Mariotti F, Huneau JF, Fouillet H. No Nutritional Lessons Can Be Learned from a Misspecified and Overrestricted Model with No Sensitivity Analysis. *J Nutr*. in press.
45. Bakaloudi DR, Halloran A, Rippin HL, Oikonomidou AC, Dardavesis TI, Williams J, et al. Intake and adequacy of the vegan diet. A systematic review of the evidence. *Clin Nutr*. 2021;40(5):3503-21. doi: 10.1016/j.clnu.2020.11.035.
46. Springmann M, Wiebe K, Mason-D'Croz D, Sulser TB, Rayner M, Scarborough P. Health and nutritional aspects of sustainable diet strategies and their association with environmental impacts: a global modelling analysis with country-level detail. *Lancet Planet Health*. 2018;2(10):e451-e61. doi: 10.1016/S2542-5196(18)30206-7.
47. Cifelli CJ, Houchins JA, Demmer E, Fulgoni VL. Increasing Plant Based Foods or Dairy Foods Differentially Affects Nutrient Intakes: Dietary Scenarios Using NHANES 2007-2010. *Nutrients*. 2016;8(7):422. doi: 10.3390/nu8070422.
48. Mangano KM, Tucker KL. Bone Health and Vegan Diets. In: Mariotti F, ed. *Vegetarian and Plant-Based Diets in Health and Disease Prevention*: Academic Press, 2017:315-31.
49. Thorpe DL, Beeson WL, Knutsen R, Fraser GE, Knutsen SF. Dietary patterns and hip fracture in the Adventist Health Study 2: combined vitamin D and calcium supplementation mitigate increased hip fracture risk among vegans. *The American journal of clinical nutrition*. 2021;114(2):488-95. doi: 10.1093/ajcn/nqab095.
50. Craig WJ, Mangels AR, Fresan U, Marsh K, Miles FL, Saunders AV, et al. The Safe and Effective Use of Plant-Based Diets with Guidelines for Health Professionals. *Nutrients*. 2021;13(11):4144. doi: 10.3390/nu13114144.
51. Herforth A, Arimond M, Alvarez-Sanchez C, Coates J, Christianson K, Muehlhoff E. A Global Review of Food-Based Dietary Guidelines. *Adv Nutr*. 2019;10(4):590-605. doi: 10.1093/advances/nmy130.
52. Halkjaer J, Olsen A, Bjerregaard LJ, Deharveng G, Tjonneland A, Welch AA, et al. Intake of total, animal and plant proteins, and their food sources in 10 countries in the European Prospective Investigation into Cancer and Nutrition. *European journal of clinical nutrition*. 2009;63 Suppl 4:S16-36. doi: 10.1038/ejcn.2009.73.
53. Mariotti F, Gardner CD. Dietary Protein and Amino Acids in Vegetarian Diets-A Review. *Nutrients*. 2019;11(11):2661. doi: 10.3390/nu11112661.
54. Young VR, Pellett PL. Plant proteins in relation to human protein and amino acid nutrition. *The American journal of clinical nutrition*. 1994;59(5 Suppl):1203S-12S. doi: 10.1093/ajcn/59.5.1203S.
55. Gazan R, Brouzes CMC, Vieux F, Maillot M, Lluch A, Darmon N. Mathematical Optimization to Explore Tomorrow's Sustainable Diets: A Narrative Review. *Adv Nutr*. 2018;9(5):602-16. doi: 10.1093/advances/nmy049.

56. Macdiarmid JI, Kyle J, Horgan GW, Loe J, Fyfe C, Johnstone A, et al. Sustainable diets for the future: Can we contribute to reducing greenhouse gas emissions by eating a healthy diet? *The American journal of clinical nutrition*. 2012;96(3):632-9. doi: 10.3945/ajcn.112.038729.
57. Seconda L, Fouillet H, Huneau JF, Pointereau P, Baudry J, Langevin B, et al. Conservative to disruptive diets for optimizing nutrition, environmental impacts and cost in French adults from the NutriNet-Sante cohort. *Nat Food*. 2021;2(3):174-82. doi: 10.1038/s43016-021-00227-7.
58. Webb D, Byrd-Bredbenner C. Overcoming Consumer Inertia to Dietary Guidance. *Adv Nutr*. 2015;6(4):391-6. doi: 10.3945/an.115.008441.
59. Petersen KS, Flock MR, Richter CK, Mukherjea R, Slavin JL, Kris-Etherton PM. Healthy Dietary Patterns for Preventing Cardiometabolic Disease: The Role of Plant-Based Foods and Animal Products. *Curr Dev Nutr*. 2017;1(12):cdn.117.001289-cdn.117. doi: 10.3945/cdn.117.001289.
60. Springmann M, Godfray HC, Rayner M, Scarborough P. Analysis and valuation of the health and climate change cobenefits of dietary change. *Proc Natl Acad Sci U S A*. 2016;113(15):4146-51. doi: 10.1073/pnas.1523119113.
61. Wilson N, Cleghorn CL, Cobiac LJ, Mizdrak A, Nghiem N. Achieving Healthy and Sustainable Diets: A Review of the Results of Recent Mathematical Optimization Studies. *Adv Nutr*. 2019;10(Suppl\_4):S389-S403. doi: 10.1093/advances/nmz037.
62. Kesse-Guyot E, Chaltiel D, Wang J, Pointereau P, Langevin B, Allès B, et al. Sustainability analysis of French dietary guidelines using multiple criteria. *Nat Sustain*. 2020;3(5):377-85. doi: 10.1038/s41893-020-0495-8.
63. Segovia-Siapco G, Sabate J. Health and sustainability outcomes of vegetarian dietary patterns: a revisit of the EPIC-Oxford and the Adventist Health Study-2 cohorts. *European journal of clinical nutrition*. 2019;72(Suppl 1):60-70. doi: 10.1038/s41430-018-0310-z.
64. Baudry J, Pointereau P, Seconda L, Vidal R, Taupier-Letage B, Langevin B, et al. Improvement of diet sustainability with increased level of organic food in the diet: findings from the BioNutriNet cohort. *The American journal of clinical nutrition*. 2019;109(4):1173-88. doi: 10.1093/ajcn/nqy361.
65. Nelson ME, Hamm MW, Hu FB, Abrams SA, Griffin TS. Alignment of Healthy Dietary Patterns and Environmental Sustainability: A Systematic Review. *Adv Nutr*. 2016;7(6):1005-25. doi: 10.3945/an.116.012567.
66. Crippa M, Solazzo E, Guizzardi D, Monforti-Ferrario F, Tubiello FN, Leip A. Food systems are responsible for a third of global anthropogenic GHG emissions. *Nat Food*. 2021;2(3):198-209. doi: 10.1038/s43016-021-00225-9.
67. Poore J, Nemecek T. Reducing food's environmental impacts through producers and consumers. *Science*. 2018;360(6392):987-92. doi: 10.1126/science.aag0216.
68. Godfray HCJ, Aveyard P, Garnett T, Hall JW, Key TJ, Lorimer J, et al. Meat consumption, health, and the environment. *Science*. 2018;361(6399):eaam5324. doi: 10.1126/science.aam5324.
69. Wickramasinghe K, Breda J, Berdzuli N, Ripplin H, Farrant C, Halloran A. The shift to plant-based diets: are we missing the point? *Global Food Security*. 2021;29:100530. doi: 10.1016/j.gfs.2021.100530.
70. Reganold JP, Wachter JM. Organic agriculture in the twenty-first century. *Nat Plants*. 2016;2(2):15221. doi: 10.1038/NPLANTS.2015.221.
71. Nijdam D, Rood T, Westhoek H. The price of protein: Review of land use and carbon footprints from life cycle assessments of animal food products and their substitutes. *Food Policy*. 2012;37(6):760-70. doi: 10.1016/j.foodpol.2012.08.002.

**Table 1.** Range of adequate values of the percentage of plant protein in the diet (%PP) and corresponding minimal values of long-term health risk (*HR* criterion) in French males and females.

|                                                             | Males |               |               |       |         |       |       |       | Females       |               |       |         |       |     |
|-------------------------------------------------------------|-------|---------------|---------------|-------|---------|-------|-------|-------|---------------|---------------|-------|---------|-------|-----|
|                                                             | %PP   | Observed diet | Modeled diets |       |         |       |       |       | Observed diet | Modeled diets |       |         |       |     |
|                                                             |       | 33%           | 16%           | 20%   | 25%-70% | 75%   | 80%   | 82%   | 34%           | 16%           | 20%   | 25%-70% | 75%   | 77% |
| <b><i>HR</i> value</b>                                      | 0.983 | 0.602         | 0.180         | 0.000 | 0.004   | 0.024 | 0.049 | 0.736 | 0.516         | 0.065         | 0.000 | 0.039   | 0.052 |     |
| <b><i>HR</i> components:</b>                                |       |               |               |       |         |       |       |       |               |               |       |         |       |     |
| <b><i>Risk of excessive intake of unhealthy foods:</i></b>  |       |               |               |       |         |       |       |       |               |               |       |         |       |     |
| <b>Red meat</b>                                             | 0.236 | 0.211         | 0.065         | 0.000 | 0.000   | 0.000 | 0.023 | 0.207 | 0.347         | 0.000         | 0.000 | 0.000   | 0.000 |     |
| <b>Processed meat</b>                                       | 0.213 | 0.021         | 0.000         | 0.000 | 0.000   | 0.000 | 0.000 | 0.126 | 0.000         | 0.000         | 0.000 | 0.000   | 0.000 |     |
| <b>Sweetened beverages</b>                                  | 0.026 | 0.000         | 0.000         | 0.000 | 0.000   | 0.000 | 0.000 | 0.024 | 0.000         | 0.000         | 0.000 | 0.002   | 0.013 |     |
| <b><i>Risk of insufficient intake of healthy foods:</i></b> |       |               |               |       |         |       |       |       |               |               |       |         |       |     |
| <b>Whole grain products</b>                                 | 0.213 | 0.195         | 0.000         | 0.000 | 0.000   | 0.000 | 0.000 | 0.157 | 0.090         | 0.000         | 0.000 | 0.000   | 0.000 |     |
| <b>Legumes</b>                                              | 0.111 | 0.127         | 0.067         | 0.000 | 0.000   | 0.000 | 0.000 | 0.053 | 0.056         | 0.042         | 0.000 | 0.000   | 0.000 |     |
| <b>Fruits</b>                                               | 0.091 | 0.000         | 0.000         | 0.000 | 0.000   | 0.000 | 0.000 | 0.093 | 0.000         | 0.000         | 0.000 | 0.000   | 0.000 |     |
| <b>Vegetables</b>                                           | 0.033 | 0.000         | 0.000         | 0.000 | 0.000   | 0.000 | 0.000 | 0.021 | 0.000         | 0.000         | 0.000 | 0.000   | 0.000 |     |
| <b>Nuts &amp; seeds</b>                                     | 0.039 | 0.048         | 0.048         | 0.000 | 0.000   | 0.000 | 0.000 | 0.019 | 0.023         | 0.023         | 0.000 | 0.000   | 0.000 |     |
| <b>Milk</b>                                                 | 0.022 | 0.000         | 0.000         | 0.000 | 0.004   | 0.024 | 0.026 | 0.037 | 0.000         | 0.000         | 0.000 | 0.037   | 0.039 |     |

Values of the *HR* criterion and its individual components when optimizing *HR* under all the nutritional, dietary and acceptability constraints and an additional constraint imposing the %PP value according to an iterative grid search. Results are reported for the %PP values allowing model convergence (i.e., nutrient-adequate diets) for each sex (16%-82% and 16%-77% %PP ranges in males and females, respectively). Within these %PP values, those outside the 25%-70% range have non-null *HR* values because of excessive intake of unhealthy foods and/or insufficient intake of healthy foods.

**Table 2.** Dual values of the active constraints identified during minimization of the long-term health risk (*HR* criterion) in French males and females<sup>1</sup>.

|                                                                     | Males  |               |     |         |        |        | Females |               |     |         |        |     |
|---------------------------------------------------------------------|--------|---------------|-----|---------|--------|--------|---------|---------------|-----|---------|--------|-----|
|                                                                     | %PP    | Modeled diets |     |         |        |        |         | Modeled diets |     |         |        |     |
|                                                                     |        | 16%           | 20% | 25%-70% | 75%    | 80%    | 82%     | 16%           | 20% | 25%-70% | 75%    | 77% |
| <b>%PP constraint<sup>2</sup></b>                                   | -0.246 | -0.081        | NS  | 0.003   | 0.004  | 0.037  | -0.166  | -0.042        | NS  | 0.004   | 0.017  |     |
| <b>Nutrients that are more limiting as %PP increase<sup>3</sup></b> |        |               |     |         |        |        |         |               |     |         |        |     |
| <b>Iodine</b>                                                       | NS     | NS            | NS  | 0.002   | 0.005  | 0.058  | NS      | NS            | NS  | 0.006   | 0.043  |     |
| <b>Sodium</b>                                                       | NS     | -0.023        | NS  | -0.002  | -0.005 | -0.041 | NS      | NS            | NS  | -0.006  | -0.027 |     |
| <b>Bioavailable iron</b>                                            | NS     | NS            | NS  | NS      | NS     | NS     | NS      | 0.096         | NS  | 0.014   | 0.027  |     |
| <b>Vitamin B12</b>                                                  | NS     | NS            | NS  | 0.002   | 0.004  | 0.035  | NS      | NS            | NS  | NS      | NS     |     |
| <b>Vitamin B2</b>                                                   | NS     | NS            | NS  | NS      | 0.001  | 0.006  | NS      | NS            | NS  | NS      | 0.021  |     |
| <b>Calcium</b>                                                      | NS     | NS            | NS  | NS      | 0.001  | 0.009  | NS      | NS            | NS  | 0.001   | 0.013  |     |
| <b>EPA+DHA</b>                                                      | NS     | NS            | NS  | 0.001   | 0.001  | 0.007  | NS      | NS            | NS  | 0.002   | 0.009  |     |
| <b>Vitamin A</b>                                                    | NS     | NS            | NS  | 0.001   | 0.002  | 0.009  | NS      | NS            | NS  | 0.004   | 0.001  |     |
| <b><math>\alpha</math>-linolenic acid</b>                           | NS     | NS            | NS  | 0.001   | 0.001  | 0.001  | NS      | NS            | NS  | 0.001   | 0.004  |     |
| <b>Nutrients that are more limiting as %PP decrease<sup>3</sup></b> |        |               |     |         |        |        |         |               |     |         |        |     |
| <b>Fiber</b>                                                        | 0.435  | 0.136         | NS  | NS      | NS     | NS     | 0.332   | 0.077         | NS  | NS      | NS     |     |
| <b>Sugar excluding lactose</b>                                      | -0.125 | -0.044        | NS  | NS      | NS     | -0.012 | -0.106  | -0.030        | NS  | NS      | -0.002 |     |
| <b>Saturated fatty acids</b>                                        | -0.095 | -0.074        | NS  | NS      | NS     | NS     | -0.085  | -0.036        | NS  | NS      | NS     |     |
| <b>Atherogenic fatty acids</b>                                      | -0.083 | -0.001        | NS  | NS      | NS     | NS     | -0.094  | -0.006        | NS  | NS      | NS     |     |

<sup>1</sup>Dual values when optimizing *HR* under all the nutritional, dietary and acceptability constraints and an equality constraint imposing the percentage of plant protein in the diet (%PP) value according to an iterative grid search. Results are reported for the %PP values allowing nutrient-adequate diets (16%-82% and 16%-77% %PP ranges in males and females, respectively), which includes those also allowing a null *HR* value (25%-70% %PP range in both sexes). NS, not significant (<0.0001).

<sup>2</sup>For the %PP equality constraint, dual values represent the potential effect on *HR* of the relaxation by one unit of the limiting bound, with positive (negative) values if the lower (upper) bound is limiting (e.g., for %PP=82% in males, the dual value indicates that there would be a potential *HR* gain of 0.037 if %PP was decreased from 82% to 81%).

<sup>3</sup>For nutritional constraints, dual values have been standardized to represent the potential effect on *HR* of the relaxation by 10% of the limiting bound, to classify the nutrients from the most limiting (higher absolute value) to the least limiting (lowest absolute value). Limiting nutrients have a positive (negative) dual value if their lower (upper) bound is limiting (e.g., for %PP=82% in males, the dual value for iodine indicates that there would be a potential *HR* gain of 0.058 if the lower bound for iodine intake was decreased by 10%, from 150 to 135  $\mu$ g/d). Only nutrients with an active constraint (i.e., with a non-null dual value) for at least one %PP value are presented here. For nutrients not presented in this table, dual values were always equal to zero, meaning that compliance with these constraints was not limiting.

Atherogenic fatty acids, lauric and myristic and palmitic acids; DHA, docosahexaenoic acid; EPA, eicosapentaenoic acid.

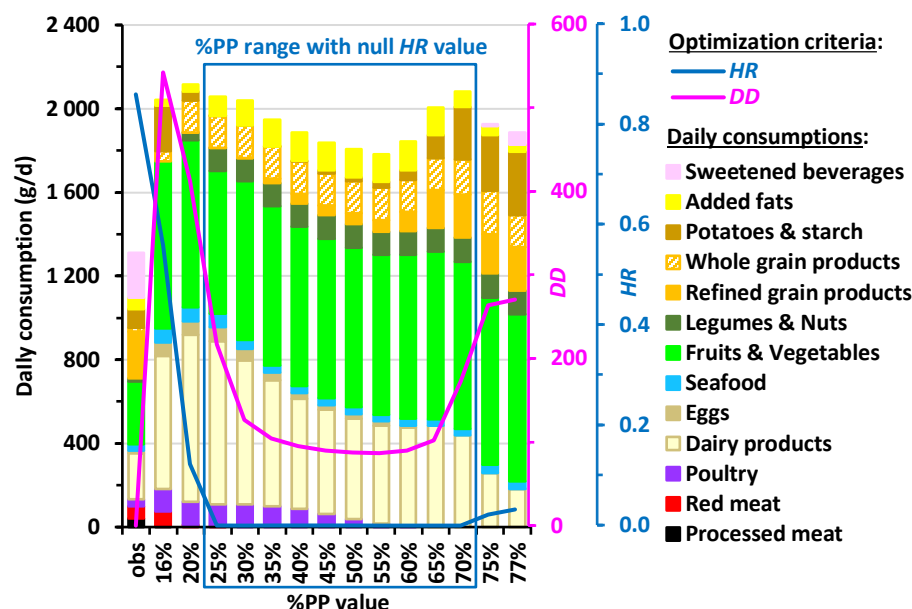

**Fig. 1. Daily food category consumption in the observed diets (obs) and modeled diets obtained by long-term health risk (*HR*) and diet departure (*DD*) minimization under imposed percentage of plant protein in the diet (%PP) in French adults.** Results are reported for all the adequate %PP values ensuring nutrient adequacy (16%-77%), which includes those also ensuring a null *HR* value (25%-70%). The bar charts represent the cumulative consumptions of food categories (black axis on the left) and the curves represent the *HR* and *DD* values (blue and pink axes on the right, respectively). For clarity, the 45 modeled food groups are not represented here but grouped into broader categories that are included in *HR* (such as red and processed meats) or represent other protein sources (such as poultry and seafood). Consumption of water, hot beverages, alcohol and miscellaneous foods are not shown for clarity. Details about food grouping and consumptions of food categories not shown here are given in Tables S5 and S2, respectively.

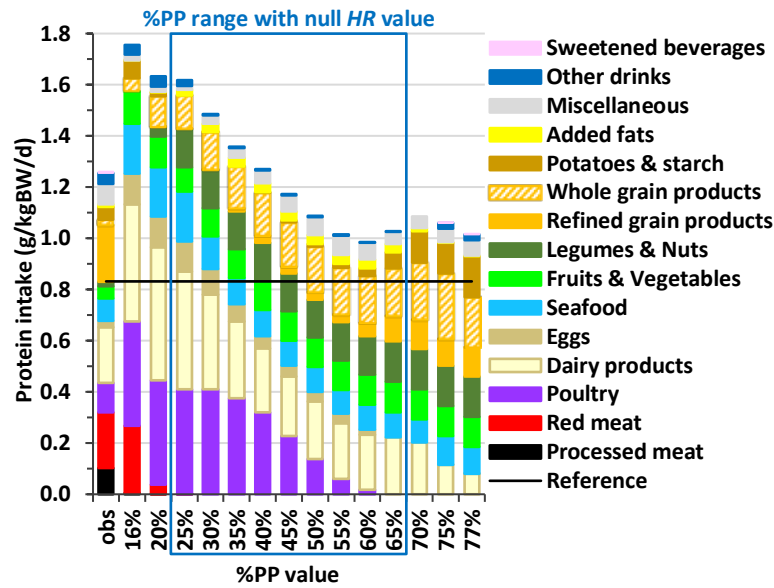

**Fig. 2. Contribution of food categories to protein intake in the observed diets (obs) and modeled diets obtained by long-term health risk (*HR*) and diet departure minimization under imposed percentage of plant protein in the diet (%PP) in French adults.** Results are reported for all the adequate %PP values ensuring nutrient adequacy (16%-77%), which includes those ensuring also a null *HR* value (25%-70%). Sections inside the bars represent the contributions of food categories to protein intake (in g of protein/kg of BW/d). See Table S5 for the detailed composition of food categories.



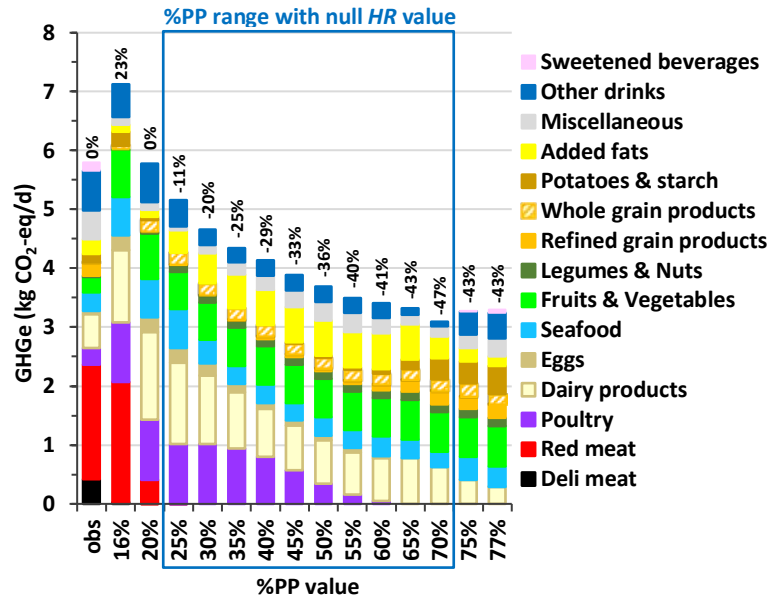

**Fig. 3. Greenhouse gas emissions (GHGe) associated with the observed (obs) and modeled diets obtained by long-term health risk (HR) and diet departure minimization under imposed percentage of plant protein in the diet (%PP) in French adults.** Results are reported for all the adequate %PP values ensuring nutrient adequacy (16%-77%), which includes those ensuring also a null HR value (25%-70%). Sections inside the bars represent the contributions of food categories to GHGe (in kg CO<sub>2</sub>-eq/d), and values above the bars represent the relative deviation in GHGe from its observed value (in %). See Table S5 for the detailed composition of food categories.
